# Supplementary material for: Comparative Skull Morphology of Uropeltid Snakes (Alethinophidia: Uropeltidae) with Special Reference to Disarticulated Elements and Variation
Source: PLoS One. 2012 Mar 8;7(3):e32450. doi: 10.1371/journal.pone.0032450 (PMC3297617; doi:10.1371/journal.pone.0032450)
Supplement: Methods S3 — Character matrix in NEXUS format for phylogenetic analysis of morphological characters in PAUP*. (NEX) [file pone.0032450.s005.nex]

#NEXUS

BEGIN TAXA;
	TITLE Taxa;
	DIMENSIONS NTAX=24;
	TAXLABELS
		Anilius Cylindrophis Anomochilus Melanophidium_punctatum_BMNH_1930.5.8.119 'Melanophidium wynaudensis BMNH 1930.5.8.124-125' Platyplecturus_madurensis_BMNH_1930.5.8.111 'Uropeltis woodmasoni BMNH 1930.5.8.73-74' Brachyophidium_rhodogaster_BMNH_1930.5.8.98 'Rhinophis drummondhayi BMNH 1930.5.8.67-68[b]' Rhinophis_sanguineus_BMNH_1930.5.8.59 Plectrurus_perrotetii_BMNH_1930.5.8.105 Pseudotyphlops_philippinus_BMNH_1978.1092 Plectrurus_aureus_CAS_17177_ Uropeltis_woodmasoni Brachyophidium_rhodogaster 'Uropeltis rubramaculatis TMM M-10028 ' 'Uropeltis melanogaster TMM M-10045 ' 'Uropeltis melanogaster TMM M-10032 ' 'Rhinophis blythi TMM M-10030 ' 'Uropeltis sp. TMM M-10036 ' 'Rhinophis philippinus? TMM M-10037   ' 'Rhinophis philippinus TMM M-10038   ' 'Rhinophis homolepis TMM M-10041  ' 'Rhinophis drummondhayi TMM M-10046 ' 
	;

END;


BEGIN CHARACTERS;
	TITLE  Character_Matrix;
	DIMENSIONS  NCHAR=33;
	FORMAT DATATYPE = STANDARD GAP = - MISSING = ? SYMBOLS = "  0 1 2";
	MATRIX
	Anilius                                          000000000000000000000000000110000
	Cylindrophis                                     000000(0 1)00000000000100000101110000
	Anomochilus                                      0010001000(0 1)000?000111111111120000
	Melanophidium_punctatum_BMNH_1930.5.8.119        010000100000000(0 1)0022111111?111111
	'Melanophidium wynaudensis BMNH 1930.5.8.124-125'001000(0 1)00000000100221111111111111
	Platyplecturus_madurensis_BMNH_1930.5.8.111      001000(0 1)1110222110122111111?121?11
	'Uropeltis woodmasoni BMNH 1930.5.8.73-74'       111112011112120112221111111121111
	Brachyophidium_rhodogaster_BMNH_1930.5.8.98      101001111012011102221111111121111
	'Rhinophis drummondhayi BMNH 1930.5.8.67-68[b]'  111111111112110112221111111121111
	Rhinophis_sanguineus_BMNH_1930.5.8.59            11111201111111011?221111111121111
	Plectrurus_perrotetii_BMNH_1930.5.8.105          111010(0 1)11112110112221111111121111
	Pseudotyphlops_philippinus_BMNH_1978.1092        111000111101101112221111111121111
	Plectrurus_aureus_CAS_17177_                     111010011112010112221111111121111
	Uropeltis_woodmasoni                             111(0 1)1(1 2)(0 1)11112(0 1 2)2(0 1)112221111111121111
	Brachyophidium_rhodogaster                       101(0 1)0(0 1 2)(0 1)111(0 1)2011(0 1)0222111111?021111
	'Uropeltis rubramaculatis TMM M-10028 '          11101001111212(0 1)11222111111?121?11
	'Uropeltis melanogaster TMM M-10045 '            111?1??1110(1 2)2111122211?11?1121111
	'Uropeltis melanogaster TMM M-10032 '            111?1??111{0 1}20111122211?11?11?1111
	'Rhinophis blythi TMM M-10030 '                  111(0 1)1001111?02111222111111?121?11
	'Uropeltis sp. TMM M-10036 '                     111?1001110201110222111111?121111
	'Rhinophis philippinus? TMM M-10037   '          11111211110212111222111111?121111
	'Rhinophis philippinus TMM M-10038   '           111?121111022210122211111??121111
	'Rhinophis homolepis TMM M-10041  '              11111111111221111222111111??21?11
	'Rhinophis drummondhayi TMM M-10046 '            11111211111201111222111111??21?11

;

END;
